# Supplementary material for: The collapse of the Laurentide-Cordilleran ice saddle and early opening of the Mackenzie Valley, Northwest Territories, constrained by 10 Be exposure dating
Source: Copernicus journal article supplement (doi:10.5194/tc-2022-120), 2022-06-23
Supplement: Supplementary file 3 [file tabs01.docx]

Supplementary table 1. Sensitivity analysis results comparing the impact of different GIA models on cosmogenic nuclide exposure age calculation. All ages were calculated used the ExPage script and integrated GIA correction within Octave.

| Sample number | Standard | ICE-6G | Lambeck et al (2017) | Gowan (2021) | ICE-6G difference | Lambeck difference | Gowan difference |
| --- | --- | --- | --- | --- | --- | --- | --- |
| NW-18-07 | 13760 | 14423 | 13860 | 13237 | -663 | -100 | 523 |
| NW-18-09 | 13889 | 14609 | 14003 | 13359 | -720 | -114 | 530 |
| NW-18-19 | 13307 | 13822 | 13371 | 12781 | -515 | -64 | 526 |
| NW-18-20 | 15139 | 16440 | 15450 | 14538 | -1301 | -311 | 601 |
| NW-18-21 | 19840 | 23223 | 20812 | 19120 | -3383 | -972 | 720 |
| NW-18-22 | 13243 | 13737 | 13302 | 12720 | -494 | -59 | 523 |
| NW-18-10 | 17448 | 19233 | 17776 | 16834 | -1785 | -328 | 614 |
| NW-18-11 | 16693 | 18096 | 16944 | 16099 | -1403 | -251 | 594 |
| NW-18-12 | 16791 | 18248 | 17054 | 16195 | -1457 | -263 | 596 |
| NW-18-15 | 32868 | 36264 | 34041 | 31555 | -3396 | -1173 | 1313 |
| NW-18-16 | 102815 | 105800 | 103500 | 97682 | -2985 | -685 | 5133 |
| NW-18-17 | 25187 | 28623 | 26417 | 24580 | -3436 | -1230 | 607 |
| NW-18-18 | 268292 | 270230 | 267760 | 261429 | -1938 | -532 | 6863 |
| NWT-MM_15-01 | 19454 | 24047 | 21064 | 19794 | -4593 | -1610 | -340 |
| NWT-MM-15-02 | 17473 | 20851 | 18710 | 17721 | -3378 | -1237 | -248 |
| NWT-MM-15-03 | 15475 | 17683 | 16278 | 15558 | -2208 | -803 | -83 |
| NWT-MM-15-04 | 14700 | 16449 | 15318 | 14711 | -1749 | -618 | -11 |
| NWT-MM-15-05 | 14070 | 15447 | 14537 | 14028 | -1377 | -467 | 42 |
| NWT-MM-15-06 | 15064 | 17052 | 15776 | 15112 | -1988 | -712 | -48 |
| NWT-MM-15-07 | 14553 | 16250 | 15147 | 14555 | -1697 | -594 | -2 |
| NWT-MM-15-08 | 18063 | 21929 | 19455 | 18366 | -3866 | -1392 | -303 |
| NWT-MM-15-09 | 14959 | 17108 | 15717 | 15013 | -2149 | -758 | -54 |
| NWT-MM-15-10 | 15961 | 18773 | 16982 | 16117 | -2812 | -1021 | -156 |
| NWT-MM-15-11 | 15299 | 17596 | 16109 | 15433 | -2297 | -810 | -134 |
| NWT-MM-15-12 | 13460 | 14567 | 13822 | 13413 | -1107 | -362 | 47 |
| NWT-MM-15-13 | 14338 | 16105 | 14926 | 14418 | -1767 | -588 | -80 |
| NWT-MM-15-14 | 13870 | 15315 | 14334 | 13900 | -1445 | -464 | -30 |
