# Supplementary material for: The collapse of the Laurentide-Cordilleran ice saddle and early opening of the Mackenzie Valley, Northwest Territories, constrained by 10 Be exposure dating
Source: Copernicus journal article supplement (doi:10.5194/tc-2022-120), 2022-06-23
Supplement: Supplementary file 4 [file tabs02.xlsx]

## Sheet: Radiocarbon ages
Table S2. Adapted database of radiocarbon ages relating to the study area (Dalton et al., 2020).
Sample Code	Latitude	Longitude	Site	Lab code	Material used for dating	Error (ka)	Radiocarbon age normalized to δ13C of -25‰ (ka)	Resevoir correction (ka)	Corrected radiocarbon age (ka)	Comments	Median calibrated age (cal. ka) and information about calibration ranges	Elevation, if reported by author/collector (M.A.S.L.). For marine cores, this refers to depth below surface.	Reference
AECV-643Cc	69.5833	-123.133	Darnley B	AECV-643Cc	shell (Hiatella arctica)	0.16	12.19	0.735	11.455	Marine ΔR value = 0.335 ka following Coulthard et al. (2010) // Assumed that reported 11.79 ka is raw measured age uncorrected for fractionation or reservoir	13.334 cal. ka (one relative area range spanning 13.077 to 13.610 cal. ka)	5	Kerr (1996) Canadian Journal of Earth Sciences 33, p. 389-403
Beta-25119	70.5833	-128.25	Baillie I	Beta-25119	Saiga tatarica	0.16	14.92	0	14.92		18.223 cal. ka (one relative area range spanning 17.845 to 18.656 cal. ka)	0	Harington and Cinq-Mars (1995) Arctic 48, p. 1-7
GSC-1989	70.08	-128.4	Mackenzie D	GSC-1989	basal peat	0.08	9.02	0	9.02		10.174 cal. ka (total of 2 relative area ranges spanning 9.895 to 10.382 cal. ka)		Rampton (1988) Quaternary Geology of the Tuktoyaktuk Coastlands, Northwest Territories. Geological Survey of Canada Memoir 423
SRR-6928	69.8917	-129.917	Liverpool B	SRR-6928	wood	0.07	10.949	0	10.949	In eolian sand	12.870 cal. ka (one relative area range spanning 12.752 to 13.009 cal. ka)	coastal section	Bateman and Murton (2006) Quaternary Science Reviews 25, p. 2552–2568
GSC-2023	69.4167	-131.975	Eskimo L	GSC-2023	wood base of peat	0.09	9.18	0	9.18		10.364 cal. ka (one relative area range spanning 10.203 to 10.570 cal. ka)		Blake (1987) Geological Survey of Canada radiocarbon dates XXVI; Geological Survey of Canada, Paper 86-7, 60 p.
GSC-1469	68.96	-133.225	Zed L	GSC-1469	basal peat	0.18	9.79	0	9.79		11.207 cal. ka (total of 3 relative area ranges spanning 10.661 to 11.815 cal. ka)	0	Rampton and Bouchard (1975) Surficial geology of Tuktoyaktuk, District of Mackenzie. Geological Survey of Canada Paper 74-53, 17 pp.
S-277	69.52	-135.78	Garry I	S-277	wood base of peat	0.25	11.7	0	11.7		13.587 cal. ka (one relative area range spanning 13.093 to 14.132 cal. ka)		Rampton (1988) Quaternary Geology of the Tuktoyaktuk Coastlands, Northwest Territories. Geological Survey of Canada Memoir 423
GSC-516	69.51	-135.79	Garry I	GSC-516	basal? peat	0.15	10.3	0	10.3		12.099 cal. ka (total of 3 relative area ranges spanning 11.601 to 12.621 cal. ka)	13	Lowdon et al. (1971) Geological Survey of Canada Radiocarbon Dates XI, Radiocarbon 13, p. 255-324 (GSC paper 71-7)
GSC-3524	62.05	-118.7	L Demain	GSC-3524	lake sed	0.2	10.5	0	10.5		12.329 cal. ka (total of 3 relative area ranges spanning 11.700 to 12.785 cal. ka)	750	MacDonald (1987) Quaternary Research 28, p. 245-262
	61.47	-120.92	Fort Simpson	WAT-405	basal peat	?	10.38	0	10.38		unable to calibrate because of unknown error - so used 1 (~12.271 ka)		Chatwin (1983) Holocene temperatures in the Upper Mackenzie Valley determined by oxygen isotope analysis of peat cellulose. In: Proceedings of the fourth international conference on permafrost, Fairbanks, Alaska. National Academy Press, p. 129-130
GSC-5750	62.717	-121.1	Fort Simpson	GSC-5750	basal peat	0.11	9.19	0	9.19		10.378 cal. ka (total of 2 relative area ranges spanning 10.177 to 10.661 cal. ka)		McNeely (2006) Geological Survey of Canada Radiocarbon Dates XXXV, Geological Survey of Canada Current Research 2006-G, 151 p.
UCIAMS-34694	60.3422	-121.236	Trout Lake	UCIAMS-34694	spruce needle	0.025	7.6	0	7.6		8.397 cal. ka (one relative area range spanning 8.368 to 8.422 cal. ka)		Huntley et al. (2008) Surficial deposits, landforms, glacial history, and reconnaissance drift sampling in the Trout Lake map area, Northwest Territories. Geological Survey of Canada Current Research 2008-14. 14 p.
CAMS-168296	61.3102	-121.301	SC1-BC	CAMS-168296	organic material	0.04	8.6	0	8.6	basal radiocarbon age from peat core	9.551 cal. ka (total of 2 relative area ranges spanning 9.525 to 9.680 cal. ka)		Pelletier et al. (2017) The Holocene 27(9), p. 1391–1405
CAMS-168471	61.3105	-121.307	SC1-BE	CAMS-168471	organic material	0.035	7.395	0	7.395	basal radiocarbon age from peat core	8.240 cal. ka (one relative area range spanning 8.164 to 8.339 cal. ka)		Pelletier et al. (2017) The Holocene 27(9), p. 1391–1405
CAMS-167868	61.3108	-121.313	SC1-P	CAMS-167868	organic material	0.035	8.93	0	8.93	basal radiocarbon age from peat core	10.051 cal. ka (total of 2 relative area ranges spanning 9.908 to 10.0091 cal. ka)		Pelletier et al. (2017) The Holocene 27(9), p. 1391–1405
UCIAMS-34406	61.8642	-121.35	Fort Simpson	UCIAMS-34406	Bullrush seeds	0.02	8.79	0	8.79		9.802 cal. ka (one relative area range spanning 9.691 to 9.901 cal. ka)		Huntley et al. (2008) Surficial deposits, landforms, glacial history, and reconnaissance drift sampling in the Trout Lake map area, Northwest Territories. Geological Survey of Canada Current Research 2008-14. 14 p.
WAT-2351	62.25	-122.4	Rugged L	WAT-2351	lake sed	0.11	9.05	0	9.05		10.201 cal. ka (total of 4 relative area ranges spanning 9.888 to 10.505 cal. ka)	152	McLeod and MacDonald (1997) Journal of Biogeography 24, p.865–881
TO-217	69.3683	-122.577	Brock R	TO-217	shell (Hiatella arctica)	0.1	11.68	0.735	10.945	Marine ΔR value = 0.335 ka following Coulthard et al. (2010) // Date originally normalized to 0	12.882 cal. ka (one relative area range spanning 12.744 to 13.076 cal. ka)	6	Kerr (1996) Canadian Journal of Earth Sciences 33, p. 389-403
GSC-1139	68.2333	-122.633	Erly L	GSC-1139	peat	0.15	10.8	0	10.8		12.773 cal. ka (one relative area range spanning 12.576 to 13.090 cal. ka)		Lowdon et al. (1971) Geological Survey of Canada Radiocarbon Dates XI, Radiocarbon 13, p. 255-324 (GSC paper 71-7)
GSC-4757	69.5833	-123.117	Brock Lagoon	GSC-4757	shell (Hiatella arctica)	0.1	11.6	0.735	10.865	Marine ΔR value = 0.335 ka following Coulthard et al. (2010)	12.819 cal. ka (one relative area range spanning 12.703 to 13.011 cal. ka)	5	McNeely (2006) Geological Survey of Canada Radiocarbon Dates XXXV, Geological Survey of Canada Paper 2006-G, 156 p.
GSC-6111	62.786	-123.121	Willowlake R	GSC-6111	basal peat	0.09	9.38	0	9.38		10.605 cal. ka (total of 4 relative area ranges spanning 10.284 to 10.803 cal. ka)		McNeely (2006) Geological Survey of Canada Radiocarbon Dates XXXV, Geological Survey of Canada Current Research 2006-G, 151 p.
I-9997	60.3216	-123.335		I-9997	Bison sp.	0.19	9.565	0	9.565		10.884 cal. ka (one relative area range spanning 10.289 to 11.320 cal. ka)	230	Harington (2003) Annotated Bibliography of Quaternary Vertebrates of Northern North America. University of Toronto Press. 360 p. // Bednarski (2008) Geological Survey of Canada Bulletin 596, 59 p.
UCIAMS-26792	63.9425	-123.474	Blackwater Lake	UCIAMS-26792	wood fragment	0.025	8.35	0	8.35	"Organics confined between debris-thaw flow diamictons"	9.366 cal. ka (one relative area range spanning 9.292 to 9.460 cal. ka)		Huntley et al. (2008) Surficial deposits, landforms, glacial history, and reconnaissance drift sampling in the Trout Lake map area, Northwest Territories. Geological Survey of Canada Current Research 2008-14. 14 p.
UCIAMS-26791	63.9472	-123.476	Blackwater Lake	UCIAMS-26791	seeds	0.035	8.72	0	8.72	"Organics confined between debris-thaw flow diamictons"	9.662 cal. ka (total of 4 relative area ranges spanning 9.548 to 9.888 cal. ka)		Huntley et al. (2008) Surficial deposits, landforms, glacial history, and reconnaissance drift sampling in the Trout Lake map area, Northwest Territories. Geological Survey of Canada Current Research 2008-14. 14 p.
unknown	64.9183	-124.65	Brackett R	unknown	wood, twigs	0.025	10.9	0	10.9	In alluvium overlying Lake Mackenzie sediment	12.799 cal. ka (four relative area ranges spanning 12.7052 to 12.878 cal. ka)		Couch and Eyles (2008) Palaeogeography, Palaeoclimatology, Palaeoecology 268, p. 26–38
unknown	64.915	-124.683	Tulita	unknown	wood, twigs	0.08	9.13	0	9.13	Youngest of 3 date this section in sand that may represent last remnant of Lake Mackenzie or post-lake alluvium	10.317 cal. ka (one relative area range spanning 10.175 to 10.511 cal. ka)		Couch and Eyles (2008) Palaeogeography, Palaeoclimatology, Palaeoecology 268, p. 26–38
GSC-6805	65.3345	-124.823	Daived L	GSC-6805	wood in lake sed	0.13	10.9	0	10.9		12.861 cal. ka (one relative area range spanning 12.695 to 13.094 cal. ka)	1000	Duk-Rodkin (unpublished)
UCIAMS-23886	63.6294	-125.432	Redstone River	UCIAMS-23886	wood	0.08	9.21	0	9.21	wood in till	10.384 cal. ka (one relative area range spanning 10.234 to 10.570 cal. ka)		Huntley et al. (2008) Surficial deposits, landforms, glacial history, and reconnaissance drift sampling in the Trout Lake map area, Northwest Territories. Geological Survey of Canada Current Research 2008-14. 14 p.
GSC-2328	64.9417	-125.496	Great Bear R	GSC-2328	organic detritus in alluvium	0.26	10.6	0	10.6	Minimum for glacial lake	12.425 cal. ka (total of 2 relative area ranges spanning 11.623 to 13.091 cal. ka)	95	Lowdon and Blake (1979) Geological Survey of Canada Radiocarbon Dates XIX, Geological Survey of Canada Paper 79-7
I-15020	64.8833	-125.667	Little Bear R	I-15020	wood	0.17	11.53	0	11.53		13.401 cal. ka (two relative area ranges spanning 13.112 to 13.751 cal. ka)	83	Smith (1992) Canadian Journal ofEarth Sciences 29, p. 1756-1766
GSC-3536	65.217	-126.117	L Mélèze	GSC-3536	lake sed	0.34	11	0	11		12.915 cal. ka (one relative area range spanning 12.829 to 13.068 cal. ka)	650	MacDonald (1987) Quaternary Research 28, p. 245-262
GSC-2320	65.58	-126.325	Kelly L	GSC-2320	basal? peat	0.11	9.57	0	9.57		10.912 cal. ka (total of 2 relative area ranges spanning 10.584 to 11.197 cal. ka)		McNeely (1989) Geological Survey of Canada radiocarbon dates XXVIII; Geological Survey of Canada, Paper 88-7, 93 p
GSC-2379	65.58	-126.325	Kelly L	GSC-2379	peat, not basal	0.08	9.6	0	9.6		10.943 cal. ka (one relative area range spanning 10.707 to 11.189 cal. ka)		McNeely (1989) Geological Survey of Canada radiocarbon dates XXVIII; Geological Survey of Canada, Paper 88-7, 93 p
I-14619	65.65	-126.4	Kelly L	I-14619	basal peat	0.16	9.38	0	9.38		10.632 cal. ka (total of one relative area range spanning 10.242 to 11.110 cal. ka)		Smith (1992) Canadian Journal ofEarth Sciences 29, p. 1756-1766
TO-2375	65.017	-127.483	Bell's L	TO-2375	wood	0.15	10.23	0	10.23		11.955 cal. ka (total of 2 relative area ranges spanning 11.345 to 12.589 cal. ka)	580	Szeicz et al. (1995) Palaeogeography Palaeoclimatology Palaeoecology 113, p. 351–371
GSC-6249	65.105	-127.529	Norman Wells	GSC-6249	basal peat	0.11	10.3	0	10.3		12.114 cal. ka (total of 3 relative area ranges spanning 11.650 to 12.605 cal. ka)		McNeely (2006) Geological Survey of Canada Radiocarbon Dates XXXV, Geological Survey of Canada Current Research 2006-G, 151 p.
GSC-3763	70.123	-128.34	Liverpool B	GSC-3763	basal peat	0.08	9.4	0	9.4		10.632 cal. ka (total of 4 relative area ranges spanning 10.307 to 11.069 cal. ka)		McNeely (2006) Geological Survey of Canada Radiocarbon Dates XXXV, Geological Survey of Canada Paper 2006-G, 156 p.
TO-1190	65.65	-128.883	Mountain R	TO-1190	wood	0.09	11.76	0	11.76		13.627 cal. ka (one relative area range spanning 13.456 to 13.795 cal. ka)	87	Smith (1992) Canadian Journal ofEarth Sciences 29, p. 1756-1766
GSC-1573	65.8167	-129	Sans Sault Rapids	GSC-1573	wood	0.22	11.2	0	11.2	Minimum for glacial lake	13.102 cal. ka (one relative area range spanning 12.742 to 13.477 cal. ka)	75	Mackay and Mathews (1973) Canadian Journal of Earth Sciences 10, p. 26-41
I-3734	65.833	-129.083	Fort Good Hope	I-3734	wood	0.17	11.53	0	11.53		13.401 cal. ka (one relative area range spanning 13.112 to 13.751 cal. ka)	60	Mackay and Mathews (1973) Canadian Journal of Earth Sciences 10, p. 26-41
TO-1191	65.95	-129.2	Hume R	TO-1191	wood	0.09	11.44	0	11.44		13.315 cal. ka (one relative area range spanning 13.163 to 13.485 cal. ka)		Smith (1992) Canadian Journal ofEarth Sciences 29, p. 1756-1766
GSC-3532	62.78	-129.265	Howards Pass	GSC-3532	basal peat	0.1	9.61	0	9.61		10.945 cal. ka (one relative area range spanning 10.663 to 11.212 cal. ka)	1600	Blake (1983) Geological Survey of Canada Radiocarbon Dates XXIII, Geological Survey of Canada Paper 83-7, 34 p.
GSC-1303	69.33	-130.92	Kugaluk R	GSC-1303	basal? peat	0.16	10.9	0	10.9		12.866 cal. ka (total of three relative area ranges spanning 12.515 to 13.158 cal. ka)	3	Rampton (1988) Quaternary Geology of the Tuktoyaktuk Coastlands, Northwest Territories. Geological Survey of Canada Memoir 423
GSC-4905	69.6667	-131.167	Tuktoyaktuk NE	GSC-4905	lake sed	0.14	13.8	0	13.8		16.732 cal. ka (one relative area range spanning 16.296 to 17.086 cal. ka)	90	McNeely and Jorgensen (1993) Geological Survey of Canada radiocarbon dates XXXI; Geological Survey of Canada, Paper 91-7, 85 p.
GSC-3419	67.65	-132.017	Sweet Little L	GSC-3419	lake sed	0.1	9.52	0	9.52		10.855 cal. ka (one relative area range spanning 10.571 to 11.174 cal. ka)	300	Ritchie (1984) Canadian Journal of Botany 62, p. 1385-1392
GSC-1784-2	69.0667	-132.717	Eskimo L	GSC-1784-2	grass/sedge	0.15	12.9	0	12.9		15.424 cal. ka (one relative area range spanning 14.985 to 15.857 cal. ka)	13.5	Rampton (1988) Quaternary Geology of the Tuktoyaktuk Coastlands, Northwest Territories. Geological Survey of Canada Memoir 423
Beta-34312	69.25	-133	Topkak Marsh	Beta-34312	organic lake silt	0.21	14.02	0	14.02		17.027 cal. ka (one relative area range spanning 16.366 to 17.558 cal. ka)	1.15	Hill et al. (1985) Canadian Journal of Earth Sciences 22(10): 1383-1393
GSC-512	69.4	-133.067	Ibyuk Pingo	GSC-512	peat	0.44	14.13	0	14.13	Oldest accepted age this site (cf GSC-481)	17.168 cal. ka (one relative area range spanning 15.943 to 18.256 cal. ka)	30	Lowdon and Blake (1973) Geological Survey of Canada Radiocarbon Dates XIII, Geological Survey of Canada Paper 73-7, 61 p.
AA-13013	69.4097	-133.141	Peninsula Pt	AA-13013	biogenic CO2 in segregation ice	0.1	13.86	0	13.86	Considered biogenic based on C13 value of -18.1 per mil	16.820 cal. ka (one relative area range spanning 16.489 to 17.078 cal. ka)		Moorman (1998) PhD thesis: The development and preservation of tabular massive ground ice in permafrost regions. Carleton University, Ottawa, Canada, 308 p.
GSC-1214	69.4083	-133.15	Peninsula Pt	GSC-1214	peat	0.18	12.8	0	12.8		15.267 cal. ka (total of two relative area ranges spanning 14.446 to 15.830 cal. ka)	0	Lowdon et al. (1971) Geological Survey of Canada Radiocarbon Dates XI, Radiocarbon 13, p. 255-324 (GSC paper 71-7) // Rampton (1988) Quaternary Geology of the Tuktoyaktuk Coastlands, Northwest Territories, Geological Survey of Canada Memoir 423, 98 p.
WAT-3027	68.288	-133.25	CC-P	WAT-3027	basal peat	0.08	9.06	0	9.06		10.223 cal. ka (total of 3 relative area ranges spanning 9.913 to 10.487 cal. ka)		Vardy et al. (2000) The Holocene 10(2), p. 273–280
GSC-3387	68.6	-133.417	Twin Tamarack L	GSC-3387	lake sed	0.15	13	0	13		15.558 cal. ka (one relative area range spanning 15.137 to 15.995 cal. ka)	45	Ritchie (1977) Ecological Monographs 47, p. 401-423
GSC-1321	69.05	-133.45	Tuk-5	GSC-1321	lake sed	0.17	12.9	0	12.9		15.422 cal. ka (one relative area range spanning 14.924 to 15.966 cal. ka)	50	Ritchie and Hare (1971) Quaternary Research 1(3), p.331-342
GSC-2075	68.267	-133.467	M Lake	GSC-2075	lake sed	0.09	11.1	0	11.1		13.002 cal. ka (one relative area range spanning 12.822 to 13.169 cal. ka)	75	Ritchie (1977) Ecological Monographs 47, p. 401-423
GSC-3302	69.25	-133.6	Sleet L	GSC-3302	gyttja	0.11	12.5	0	12.5		14.685 cal. ka (one relative area range spanning 14.211 to 15.140 cal. ka)	40	Spear (1993) Review of Palaeobotany and Palynology 79 (1-2), p. 99-111
GSC-1160	68.9333	-133.633	Parsons L	GSC-1160	twigs & peat	0.16	11.4	0	11.4		13.287 cal. ka (one relative area range spanning 12.993 to 13.596 cal. ka)		Lowdon and Blake (1973) Geological Survey of Canada Radiocarbon Dates XIII, Geological Survey of Canada Paper 73-7, 61 p.
GSC-1514	68.3667	-133.742	Twin L	GSC-1514	peat	0.16	11.5	0	11.5		13.374 cal. ka (total of 2 relative area ranges spanning 13.096 to 13.743 cal. ka)	15	Lowdon and Blake (1973) Geological Survey of Canada Radiocarbon Dates XIII, Geological Survey of Canada Paper 73-7, 61 p. // Rampton (1988) Quaternary Geology of the Tuktoyaktuk Coastlands, Northwest Territories, Geological Survey of Canada Memoir 423, 98 p.
OxA-18549	67.6094	-133.747	Tsiigchtchic	OxA-18549	Bison priscus	0.045	11.83	0	11.83	In outwash gravel at mouth of Arctic Red River entering Mackenzie River	13.685 cal. ka (total of two relative area ranges spanning 13.528 to 13.789 cal. ka)	32	Zazula et al. (2009) Arctic 62(3), p. 273-280
BGS-240	68.95	-133.75	Parsons L	BGS-240	peat in marl	0.13	9.89	0	9.89		11.380 cal. ka (total of 3 relative area ranges spanning 10.821 to 11.826 cal. ka)	320	Delorme et al. (1977) Canadian Journal of Earth Sciences 14(9), p. 2029-2046
unknown (Beta-)	69.25	-134.3	Cabin Creek L	unknown (Beta-)	wood	0.08	11.7	0	11.7		13.559 cal. ka (total of two relative area ranges spanning 13.372 to 13.763 cal. ka)		Dallimore et al. (2000) Journal of Paleolimnology 23 (3), p. 261-283
GSC-1286	69	-134.67	Tununuk	GSC-1286	basal peat	0.16	11	0	11		12.935 cal. ka (total of two relative area ranges spanning 12.707 to 13.226 cal. ka)	14	Rampton (1988) Quaternary Geology of the Tuktoyaktuk Coastlands, Northwest Territories. Geological Survey of Canada Memoir 423
BGS-139	67.2667	-135.233	Ft Macpherson	BGS-139	limnic peat	0.08	9.96	0	9.96	Minimum for glacial lake	11.445 cal. ka (one relative area range spanning 11.235 to 11.740 cal. ka)	300	Pettapiece and Zoltai (1974) Soil environments in the western Canadian subarctic. In: Quaternary Environments, Geography Monographs 5, p. 279-292 // Delorme et al. (1977) Canadian Journal of Earth Sciences 14, p. 2029–2046
UCIAMS-81875	67.265	-135.271	FM3	UCIAMS-81875	Equus sp.	0.06	18.1	0	18.1	Found loose at base of section but inferred to have come from a debris-rich ice unit below till	22.058 cal. ka (one relative area range spanning 21.890 to 22.220 cal. ka)	380	Lacelle et al. (2013) Quaternary Research 80, 274–283.
OS-1118799	71.2264	-126.452		OS-1118799	mixed benthic foraminifera	0.07	12	0.735	11.265	Marine ΔR value = 0.335 ka following Coulthard et al. (2010) // marine sediment core	13.165 cal. ka (one relative area range spanning 13.089 to 13.302 cal. ka)		Lakeman et al. (2018) Geology 46 (3), p. 211-214
UGAMS-1757	71.24	-126.46	Core AMD2004 (CASES)-124-PC	UGAMS-1757	foraminifera, mixed	0.09	11.56	0.735	10.825	just beyond limit of drumlins ; core penetrates stacked tills but their age assignment requires extrapolation; Marine ΔR value = 0.335 ka following Coulthard et al. (2010)	12.785 cal. ka (total of two relative area ranges spanning 12.626 to 12.994 cal. ka)	-442	Scott et al. (2009) Paleoceanography 24, p. PA2219
NOSAMS-95439	69.348	-137.987	Core Arctic Kiggiak-MTW01-PC	NOSAMS-95439	Shell Fragments (Mollusk fragments)	0.04	9.08	0.735	8.345	minor downward core extrapolation via an age model to estimate target stratum; uncertainty ~1 kyr; reservoir correction follows Coulthard et al. (2010)	9.362 cal. ka (total of two relative area ranges spanning 9.149 to 9.475 cal. ka)	45	O'Regan et al. (2018) Boreas, 47(4), p. 1102-1117
GSC-2745	65.6833	-133.442	Snake R	GSC-2745	wood	0.17	11.8	0	11.8		13.675 cal. ka (one relative area range spanning 13.337 to 14.044 cal. ka)	455	McNeely (1989) Geological Survey of Canada radiocarbon dates XXVIII; Geological Survey of Canada, Paper 88-7, 93 p
BGS-142	66.1667	-134.133	Peel R	BGS-142	lake sed	0.08	10.82	0	10.82		12.775 cal. ka (one relative area range spanning 12.673 to 12.925 cal. ka)		Zoltai and Tarnocai (1975) Canadian Journal of Earth Sciences 12(1): 28-43
GSC-2393	65.95	-134.983	Peel R	GSC-2393	wood	0.18	10.6	0	10.6	Minimum for glacial lake	12.500 cal. ka (total of 3 relative area ranges spanning 11.882 to 12.893 cal. ka)	275	Lowdon and Blake (1979) Geological Survey of Canada Radiocarbon Dates XIX, Geological Survey of Canada Paper 79-7, 58 p.
BGS-143	65.9833	-135.05	Peel R	BGS-143	limnic peat	0.11	14.41	0	14.41	Minimum for glacial lake	17.592 cal. ka (total of two relative area ranges spanning 17.168 to 17.956 cal. ka)	320	Pettapiece and Zoltai (1974) Soil environments in the western Canadian subarctic. In: Quaternary Environments, Geography Monographs 5, p. 279-292 // Delorme et al. (1977) Canadian Journal of Earth Sciences 14, p. 2029–2046
BGS-144	65.98	-135.05	Peel R	BGS-144	basal peat	0.08	10.47	0	10.47		12.388 cal. ka (one relative area range spanning 12.044 to 12.677 cal. ka)	320	Delorme et al. (1977) Canadian Journal of Earth Sciences 14(9), p. 2029-2046
GSC-67-2	64.6167	-135.167	Hart L	GSC-67-2	lake sed	0.14	12.12	0	12.12		14.036 cal. ka (total of four relative area ranges spanning 13.607 to 14.814 cal. ka)		Dyck and Fyles (1963) Geological Survey of Canada Radiocarbon Dates II, Radiocarbon 5, p. 39-55
GSC-3691	66.22	-135.18	Caribou R	GSC-3691	basal peat	0.12	12.4	0	12.4		14.542 cal. ka (one relative area range spanning 14.085 to 15.005 cal. ka)	440	McNeely and McCuaig (1991) Geological Survey of Canada Radiocarbon Dates XXIX, Geological Survey of Canada Paper 89-7, 134 p.
GSC-2785	65.95	-135.933	Lateral P	GSC-2785	lake sed	0.26	14.8	0	14.8		18.037 cal. ka (one relative area range spanning 17.384 to 18.664 cal. ka)	650	Lowdon and Blake (1981) Geological Survey of Canada Radiocarbon Dates XXII, Geological Survey of Canada Paper 81-7, 22 p.
Beta-250434	66.5667	-136.967	Eagle R.	Beta-250434	herbs in glacial lake sed	0.08	15.12	0	15.12	Maximum level of glacial Lake Old Crow; Laurentide probably remained at its limit in Bonnett Plume basin until this time.	18.487 cal. ka (one relative area range spanning 18.249 to 18.649 cal. ka)	350	Lauriol et al. (2010) Canadian Journal of Earth Sciences 47, p. 941–955
GSC-3133	67.1	-137.05	Eagle R	GSC-3133	basal peat	0.16	9.97	0	9.97	Minimum for abandonnment of spillway beyong Late Wisconsinan limit	11.510 cal. ka (total of 5 relative area ranges spanning 10.874 to 12.418 cal. ka)		Blake (1984) Geological Survey of Canada Radiocarbon Dates XXIV, Geological Survey of Canada Paper 84-7, 35 p.
Beta-218602	67.23	-137.08	Eagle R; Bog Bluff	Beta-218602	herbaceous plant fragments in fluvial sed	0.04	13.71	0	13.71	Dates incision of the Eagle River delta deposited in glacial Lake Old Crow after lake dropped from maximum level. Approximate location.	16.584 cal. ka (one relative area range spanning 16.390 to 16.786 cal. ka)	315	Kennedy et al. (2010) Quaternary Science Reviews 29, p. 1288-1300
UCIAMS-40066	67.23	-137.08	Eagle R; Bog Bluff	UCIAMS-40066	herbaceous plant fragments in deltaic sed	0.09	15.84	0	15.84	Dates delta forming in glacial Lake Old Crow at mouth of Eagle River spillway; LIS at maximum; youngest of sequence of dates on detrital organics from this delta. Approximate location.	19.111 cal. ka (one relative area range spanning 18.905 to 19.384 cal. ka)	330	Kennedy et al. (2010) Quaternary Science Reviews 29, p. 1288-1300
GSC-159	69.08	-137.83	King Pt	GSC-159	basal peat	0.17	9.51	0	9.51	Buried in silt	10.824 cal. ka (total of 3 relative area ranges spanning 10.303 to 11.232 cal. ka)		Dyck and Fyles (1964) Geological Survey of Canada radiocarbon dates III, Geological Survey of Canada Paper 64-40, 15 p.
GSC-1792	69.075	-137.85	Sabine Pen	GSC-1792	peat	0.18	14.4	0	14.4		17.585 cal. ka (one relative area range spanning 17.079 to 18.097 cal. ka)	18	Rampton (1982) Quaternary Geology of the Yukon Coastal Plain. Geological Survey of Canada Bulletin 317 // Lowdon and Blake (1976) Geological Survey of Canada Radiocarbon Dates XVI, Geological Survey of Canada Paper 76-7
GSC-3982	69.08	-137.92	Shingle Pt	GSC-3982	basal peat	0.09	11.3	0	11.3		13.202 cal. ka (total of two relative area ranges spanning 13.074 to 13.403 cal. ka)		Blake (1987) Geological Survey of Canada radiocarbon dates XXVI; Geological Survey of Canada, Paper 86-7, 60 p.
BGS-197	69.25	-138.032	Phillips B	BGS-197	basal peat	0.13	10.1	0	10.1		11.671 cal. ka (total of 5 relative area ranges spanning 11.118 to 12.432 cal. ka)		Zoltai and Tarnocai (1975) Canadian Journal of Earth Sciences 12(1): 28-43
GSC-3737	69.29	-138.37	Kay Pt	GSC-3737	basal? peat	0.08	9.03	0	9.03		10.187 cal. ka (total of 2 relative area ranges spanning 9.901 to 10.404 cal. ka)		McNeely and Jorgensen (1992) Geological Survey of Canada Radiocarbon Dates XXX, Geological Survey of Canada paper 90-7, 84 p.
GSC-480	69.29	-138.39	Kay Point	GSC-480	basal peat	0.14	9.71	0	9.71		11.056 cal. ka (total of 4 relative area ranges spanning 10.588 to 11.601 cal. ka)	1	Lowdon and Blake (1976) Geological Survey of Canada Radiocarbon Dates XVI, Geological Survey of Canada Paper 76-7, 21 p. // Rampton and Bouchard (1975) Surficial geology of Tuktoyaktuk, District of Mackenzie. Geological Survey of Canada Paper 74-53, 17 pp.
GSC-121	67.47	-139.9	Twelvemile Bluff	GSC-121	basal peat	0.18	10.74	0	10.74	Minimum for Lake Old Crow	12.694 cal. ka (total of two relative area ranges spanning 12.101 to 13.090 cal. ka)		Dyck and Fyles (1964) Geological Survey of Canada radiocarbon dates III, Geological Survey of Canada Paper 64-40, 15 p.
AA-42629	67.385	-140.362	Bluefish basin	AA-42629	Poaceae	0.12	17.4	0	17.4	Within Glacial Lake Old Crow sediment	21.013 cal. ka (one relative area range spanning 20.694 to 21.398 cal. ka)	301	Zazula et al. (2004) Late Pleistocene chronology of glacial Lake Old Crow and the north-west margin of the Laurentide Ice Sheet. In: Ehlers and Gibbard (eds.) Quaternary Glaciations – Extent and Chronology, Part II, p. 347-362
AA-45505	67.385	-140.362	Bluefish basin	AA-45505	Poaceae	0.25	18.03	0	18.03	Within Glacial Lake Old Crow sediment	21.875 cal. ka (one relative area range spanning 21.139 to 22.422 cal. ka)	301	Zazula et al. (2004) Late Pleistocene chronology of glacial Lake Old Crow and the north-west margin of the Laurentide Ice Sheet. In: Ehlers and Gibbard (eds.) Quaternary Glaciations – Extent and Chronology, Part II, p. 347-362
AA-45506	67.385	-140.362	Bluefish basin	AA-45506	Lazula, Juncus	0.14	17.57	0	17.57	Within Glacial Lake Old Crow sediment	21.235 cal. ka (one relative area range spanning 20.881 to 21.750 cal. ka)	300	Zazula et al. (2004) Late Pleistocene chronology of glacial Lake Old Crow and the north-west margin of the Laurentide Ice Sheet. In: Ehlers and Gibbard (eds.) Quaternary Glaciations – Extent and Chronology, Part II, p. 347-362
AA-45507	67.385	-140.362	Bluefish basin	AA-45507	Taraxacum sp.	0.84	17.17	0	17.17	Within Glacial Lake Old Crow sediment	20.787 cal. ka (one relative area range spanning 18.841 to 22.709 cal. ka)	300	Zazula et al. (2004) Late Pleistocene chronology of glacial Lake Old Crow and the north-west margin of the Laurentide Ice Sheet. In: Ehlers and Gibbard (eds.) Quaternary Glaciations – Extent and Chronology, Part II, p. 347-362
AA-42631	67.385	-140.362	Bluefish basin	AA-42631	Poaceae caryopses, Artemisia flowers, Taraxacum achenes	0.16	18.49	0	18.49	Below or at base of Glacial Lake Old Crow sediment	22.415 cal. ka (one relative area range spanning 22.110 to 22.874 cal. ka)	300	Zazula et al. (2004) Late Pleistocene chronology of glacial Lake Old Crow and the north-west margin of the Laurentide Ice Sheet. In: Ehlers and Gibbard (eds.) Quaternary Glaciations – Extent and Chronology, Part II, p. 347-362 // Blake (1987) Geological Survey of Canada Radiocarbon Dates XXVI, Geological Survey of Canada Paper 86-7, 60 p.// Dyke et al., 2001
AA-45510	67.385	-140.362	Bluefish basin	AA-45510	Carex sp.	0.11	16.44	0	16.44	Maximum for deepest phase of Lake Old Crow; Laurentide ice still near LGM limit; lake drains shortly hereafter	19.832 cal. ka (one relative area range spanning 19.554 to 20.141 cal. ka)	301	Zazula et al. (2004) Late Pleistocene chronology of glacial Lake Old Crow and the north-west margin of the Laurentide Ice Sheet. In: Ehlers and Gibbard (eds.) Quaternary Glaciations – Extent and Chronology, Part II, p. 347-362
