# Supplementary material for: The collapse of the Laurentide-Cordilleran ice saddle and early opening of the Mackenzie Valley, Northwest Territories, constrained by 10 Be exposure dating
Source: Copernicus journal article supplement (doi:10.5194/tc-2022-120), 2022-06-23
Supplement: Supplementary file 5 [file tabs03,s04,s05,s06.xlsx]

## Sheet: LSDn and global production rate
Table S3. Outputs from Oxcal sequence models (Bronk Ramsey, 2017). For the northern sites, Model 1 was run with no outlier model. Model 2 was run using a General outlier model. Model 3 was run using a General outlier, excluding dates with agreement indices substantially <60% in model 1. Modelled dates are reported at 2 σ uncertainty. Exposure ages were calculated using the ‘primary’ production ra…
Model	Phase	Site	Sample no.	Measured age (BP)			Elevation (m)	Model 1. Modelled age (BP)			Model 2. Modelled age (BP)			Model 3. Modelled age (BP)			Notes
				Age	Int err	Ext Err		from	to	median	from	to	median	from	to	median
Northern sites	1	-	Boundary start	-	-	-	-	17672	14735	16105	17976	14652	16214	17750	14632	16084
	1	Katherine Creek	NW-18-10	16726	355	1052	1046.87	17114	14642	15829	17249	14603	15888	17127	14550	15797
	1	Katherine Creek	NW-18-11	15984	346	1008	1073.87	17031	14635	15793	17116	14629	15841	17036	14539	15758
	1	Katherine Creek	NW-18-12	16092	345	1014	1069.87	17034	14638	15799	17148	14619	15850	17047	14561	15764
	1	-	Boundary end	-	-	-	-	16652	14367	15463	16707	14251	15464	16644	14243	15403
	2	-	Boundary start	-	-	-	-	15652	13837	14673	15593	13653	14546	15547	13663	14501
	2	Norman Range	NW-18-07	13312	284	838	932.242	15206	13735	14434	15103	13599	14279	14997	13567	14230
	2	Norman Range	NW-18-09	13436	293	848	913.242	15209	13734	14438	15086	13599	14284	15006	13567	14235
	2	-	Boundary end	-	-	-	-	15020	13598	14266	14891	13476	14083	14757	13432	14034
	3	-	Boundary start	-	-	-	-	14732	13429	14019	14470	13281	13803	14366	13272	13750
	3	Mackenzie Valley	NW-18-19	12862	315	824	181.242	14403	13304	13800	14203	13215	13643	14107	13192	13595
	3	Mackenzie Valley	NW-18-20	14650	358	939	192.242	14480	13325	13845	14255	13222	13669	14157	13196	13619
	3	Mackenzie Valley	NW-18-21	19169	408	1208	196.242	14562	13339	13890	14301	13212	13664	-	-	-	Likely outlier
	3	Mackenzie Valley	NW-18-22	12820	314	821	193.242	14398	13301	13798	14214	13216	13641	14106	13192	13595
	3	-	Boundary end	-	-	-	-	14316	13042	13624	14197	12996	13497	14008	12928	13446
	4	-	Boundary start	-	-	-	-	13717	12166	12963	13639	12139	12924	13573	12156	12909
	4	Canadian Shield*	AVR16-04	12918	471	898	393	13464	11890	12703	13398	11856	12664	13378	11884	12666
	4	Canadian Shield*	AVR16-05	12410	457	865	393	13449	11853	12679	13374	11798	12640	13370	11847	12644
	4	Canadian Shield*	AVR16-06	12177	564	915	393	13451	11827	12669	13362	11779	12629	13366	11823	12636
	4	Canadian Shield*	AVR16-07	12702	570	943	393	13462	11869	12693	13385	11818	12653	13374	11859	12656
	4	Canadian Shield*	AVR16-08	12215	392	822	393	13439	11836	12667	13357	11784	12630	13360	11826	12634
	4	Canadian Shield*	AVR16-09	12542	580	942	393	13460	11854	12686	13374	11792	12647	13371	11850	12650
	4	-	Boundary end	-	-	-	-	13317	11408	12422	13250	11284	12384	13248	11400	12401
Table S4. Outputs from Oxcal sequence models (Bronk Ramsey, 2017). For the southern sites, Model 4 was run with no outlier model. Model 5 was run using a General outlier model. Model 6 was run using a General outlier, excluding dates with agreement indices substantially <60% in model 1. Modelled dates are reported at 2 σ uncertainty. Exposure ages were calculated using the ‘primary’ production ra…
Model	Phase	Site	Sample no.	Measured age (BP)			Elevation (m)	Model 4. Modelled age (BP)			Model 5. Modelled age (BP)			Model 6. Modelled age (BP)			Notes
				Age	Int err	Ext Err		from	to	median	from	to	median	from	to	median
Southern sites	1	-	Boundary start	-	-	-	-	18529	14764	16054	18427	14603	15950	16162	14208	15065
	1	Cap Mountain summit	NWT-MM-15-02	17218	473	1125	1445.85	17413	14657	15682	17347	14538	15614	15845	14172	14939
	1	Cap Mountain summit	NWT-MM-15-03	15265	495	1031	1445.85	16622	14559	15489	16584	14493	15445	15736	14181	14915
	1	Cap Mountain summit	NWT-MM-15-04	14506	464	976	1434.85	16365	14501	15402	16351	14448	15368	15689	14182	14902
	1	Cap Mountain summit	NWT-MM-15-05	13888	370	902	1413.85	16215	14447	15329	16224	14406	15304	15653	14183	14888
	1	Cap Mountain summit	NWT-MM_15-01	19151	569	1270	1402.85	17878	14666	15769	17789	14515	15675	-	-	-	Likely outlier
	1	Cap Mountain summit	NWT-MM-15-06	14865	409	971	1385.85	16460	14530	15438	16434	14466	15399	15712	14182	14908
	1	Cap Mountain summit	NWT-MM-15-07	14370	394	937	1324.85	16319	14488	15380	16309	14442	15349	15686	14182	14898
	1	Cap Mountain summit	NWT-MM-15-08	17817	490	1164	1245.85	17610	14664	15720	17530	14539	15644	-	-	-	Likely outlier
	1	-	Boundary end	-	-	-	-	15888	14132	15045	15888	14131	15030	15457	14074	14750
	2	-	Boundary start	-	-	-	-	15427	13762	14609	15422	13758	14606	15164	13794	14495
	2	Lower Franklin Mountains	NWT-MM-15-11	15113	423	990	953.847	15212	13506	14374	15214	13501	14378	15049	13589	14354
	2	Lower Franklin Mountains	NWT-MM-15-12	13310	377	873	951.847	15177	13340	14293	15185	13347	14302	15044	13498	14319
	2	Lower Franklin Mountains	NWT-MM-15-13	14209	389	927	818.282	15196	13444	14338	15190	13438	14344	15044	13549	14338
	2	Lower Franklin Mountains	NWT-MM-15-14	13744	376	897	811.282	15189	13394	14315	15186	13394	14323	15046	13530	14329
	2	Lower Franklin Mountains	NWT-MM-15-09	14785	659	1096	798.847	15208	13463	14358	15210	13464	14362	15052	13566	14347
	2	Lower Franklin Mountains	NWT-MM-15-10	15778	509	1064	780.847	15223	13521	14392	15227	13521	14394	15053	13603	14361
	2	-	Boundary end	-	-	-	-	15097	12874	14077	15113	12907	14091	15016	13180	14188

## Sheet: L+S and Arctic production rate
Table S5. Outputs from Oxcal sequence models (Bronk Ramsey, 2017). For the northern sites, Model 7 was run with no outlier model. Model 8 was run using a General outlier model. Model 9 was run using a General outlier, excluding dates with agreement indices substantially <60% in model 1. Modelled dates are reported at 2 σ uncertainty. Exposure ages were calculated using the Arctic production rate …
Model	Phase	Site	Sample no.	Measured age (BP)			Elevation (m)	Model 7. Modelled age (BP)			Model 8. Modelled age (BP)			Model 9. Modelled age (BP)			Notes
				Age	Int err	Ext Err		from	to	median	from	to	median	from	to	median
Northern sites	1	-	Boundary start	-	-	-	-	18700	16578	17525	18955	16230	17500	18875	16273	17481
	1	Katherine Creek	NW-18-10	17927	380	766	1046.87	18199	16512	17296	18324	16125	17201	18273	16151	17188
	1	Katherine Creek	NW-18-11	17142	371	736	1073.87	18084	16507	17247	18147	16068	17111	18109	16094	17100
	1	Katherine Creek	NW-18-12	17257	370	740	1069.87	18102	16507	17255	18167	16088	17126	18127	16105	17114
	1	-	Boundary end	-	-	-	-	17791	16318	16987	17829	15377	16711	17828	15410	16709
	2	-	Boundary start	-	-	-	-	16971	16114	16457	16484	14262	15188	16436	14281	15181
	2	Norman Range	NW-18-07	14241	304	609	932.242	16699	16095	16350	15641	14143	14862	15590	14182	14859
	2	Norman Range	NW-18-09	14369	313	618	913.242	16700	16096	16352	15656	14152	14873	15612	14191	14870
	2	-	Boundary end	-	-	-	-	16608	16066	16285	15393	13961	14660	15355	14005	14660
	3	-	Boundary start	-	-	-	-	16491	16038	16202	15068	13719	14383	15040	13772	14389
	3	Mackenzie Valley	NW-18-19	13929	341	619	181.242	15470	13693	14543	14793	13593	14187	14779	13629	14194
	3	Mackenzie Valley	NW-18-20	15846	388	704	192.242	16308	14559	15591	14888	13607	14245	14867	13667	14257
	3	Mackenzie Valley	NW-18-21	20730	442	888	196.242	16391	16033	16123	14844	13586	14206	-	-	-	Likely outlier
	3	Mackenzie Valley	NW-18-22	13870	340	616	193.242	15443	13681	14522	14790	13591	14185	14771	13625	14191
	3	-	Boundary end	-	-	-	-	14953	13320	14079	14659	13402	14013	14639	13414	14023
	4	-	Boundary start	-	-	-	-	14314	12971	13617	14219	12980	13599	14213	12994	13608
	4	Canadian Shield*	AVR16-04	13829	505	719	393	14072	12782	13428	14020	12775	13410	14024	12789	13420
	4	Canadian Shield*	AVR16-05	13297	490	695	393	14044	12744	13403	14002	12740	13386	14003	12748	13397
	4	Canadian Shield*	AVR16-06	13054	605	774	393	14046	12719	13394	14003	12713	13378	14003	12720	13389
	4	Canadian Shield*	AVR16-07	13602	610	792	393	14063	12756	13415	14016	12749	13398	14019	12763	13409
	4	Canadian Shield*	AVR16-08	13093	420	642	393	14029	12727	13391	13990	12720	13375	13991	12729	13386
	4	Canadian Shield*	AVR16-09	13436	622	797	393	14058	12748	13409	14011	12736	13392	14016	12748	13403
	4	-	Boundary end	-	-	-	-	13917	12378	13199	13882	12356	13181	13893	12378	13194
Table S6. Outputs from Oxcal sequence models (Bronk Ramsey, 2017). For the southern sites, Model 10 was run with no outlier model. Model 11 was run using a General outlier model. Model 12 was run using a General outlier, excluding dates with agreement indices substantially <60% in model 1. Modelled dates are reported at 2 σ uncertainty. Exposure ages were calculated using the Arctic production ra…
Model	Phase	Site	Sample no.	Measured age (BP)			Elevation (m)	Model 10. Modelled age (BP)			Model 11. Modelled age (BP)			Model 12. Modelled age (BP)			Notes
				Age	Int err	Ext Err		from	to	median	from	to	median	from	to	median
Southern sites	1	-	Boundary start	-	-	-	-	21903	17731	19629	21557	15427	19185	21801	15407	19422
	1	Cap Mountain summit	NWT-MM-15-02	18640	513	861	1445.85	19862	16742	18336	19657	15457	17962	19675	15411	18131
	1	Cap Mountain summit	NWT-MM-15-03	16522	536	814	1445.85	18106	15477	16691	18005	15349	16508	18051	15335	16533
	1	Cap Mountain summit	NWT-MM-15-04	15693	502	769	1434.85	17355	15285	16214	17334	15251	16166	17322	15151	16107
	1	Cap Mountain summit	NWT-MM-15-05	15014	400	686	1413.85	16866	15179	15969	16970	15141	15983	16912	15008	15882
	1	Cap Mountain summit	NWT-MM_15-01	20705	616	985	1402.85	20952	17356	19095	20677	15394	18648	20898	15381	18870
	1	Cap Mountain summit	NWT-MM-15-06	16055	442	741	1385.85	17559	15367	16360	17492	15300	16273	17521	15248	16244
	1	Cap Mountain summit	NWT-MM-15-07	15488	424	714	1324.85	17132	15247	16105	17133	15221	16087	17112	15116	16009
	1	Cap Mountain summit	NWT-MM-15-08	19166	528	886	1245.85	20204	17017	18629	19978	15455	18241	20114	15399	18424
	1	-	Boundary end	-	-	-	-	16289	14921	15584	16420	14935	15644	16288	14738	15492
	2	-	Boundary start	-	-	-	-	15968	14680	15310	16067	14687	15358	15875	14450	15155
	2	Lower Franklin Mountains	NWT-MM-15-11	16130	452	750	953.847	15762	14487	15126	15860	14484	15173	15691	14263	14968
	2	Lower Franklin Mountains	NWT-MM-15-12	14205	402	663	951.847	15681	14257	15018	15807	14258	15065	15605	14037	14852
	2	Lower Franklin Mountains	NWT-MM-15-13	15124	414	697	818.282	15712	14403	15077	15824	14404	15123	15638	14186	14917
	2	Lower Franklin Mountains	NWT-MM-15-14	14632	401	675	811.282	15690	14335	15045	15809	14333	15091	15619	14120	14883
	2	Lower Franklin Mountains	NWT-MM-15-09	15744	702	913	798.847	15745	14427	15097	15855	14426	15144	15676	14200	14935
	2	Lower Franklin Mountains	NWT-MM-15-10	16800	542	826	780.847	15785	14508	15142	15898	14502	15187	-	-	-	Likely outlier
	2	-	Boundary end	-	-	-	-	15592	13841	14834	15737	13843	14883	15538	13582	14647
